# Supplementary material for: Sex-Specific Effects of a Maternal Obesogenic Diet High in Fat and Sugar on Offspring Adiposity, Growth, and Behavior
Source: MDPI journal article supplement (doi:10.3390/nu15214594), 2023-10-29
Supplement: s1 [file s1]

Supplementary Figure 1

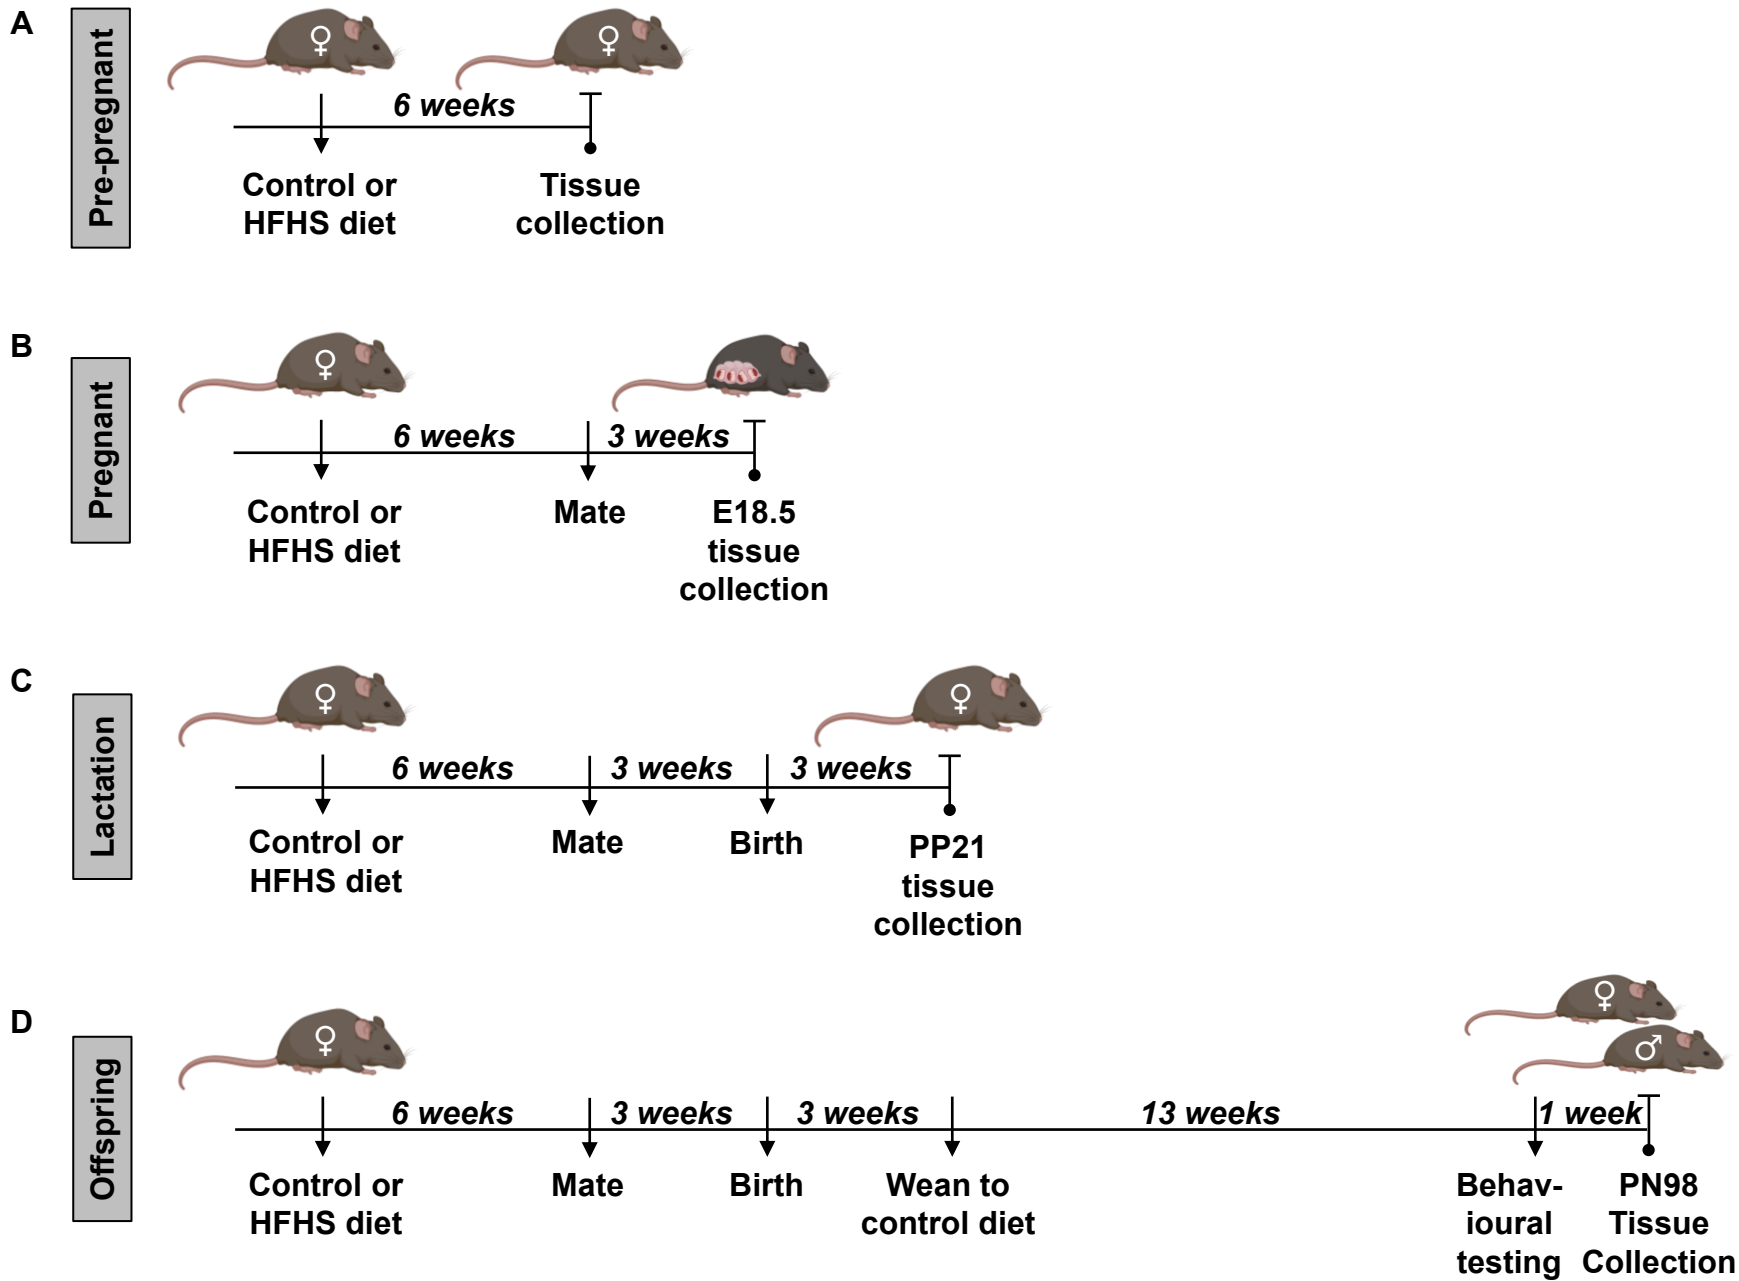

**Supplementary Figure 1.** Representation of the experimental timeline, showing the timing of tissue collection in pre-pregnant mice (A), pregnant mice (B), at lactation (C), and in adult offspring (D). E, embryonic day; PN, postnatal day; PP, post-partum day.
