# Supplementary material for: Sex-Specific Effects of a Maternal Obesogenic Diet High in Fat and Sugar on Offspring Adiposity, Growth, and Behavior
Source: MDPI journal article supplement (doi:10.3390/nu15214594), 2023-10-29
Supplement: s1 [file s1]

Supplementary Figure 3

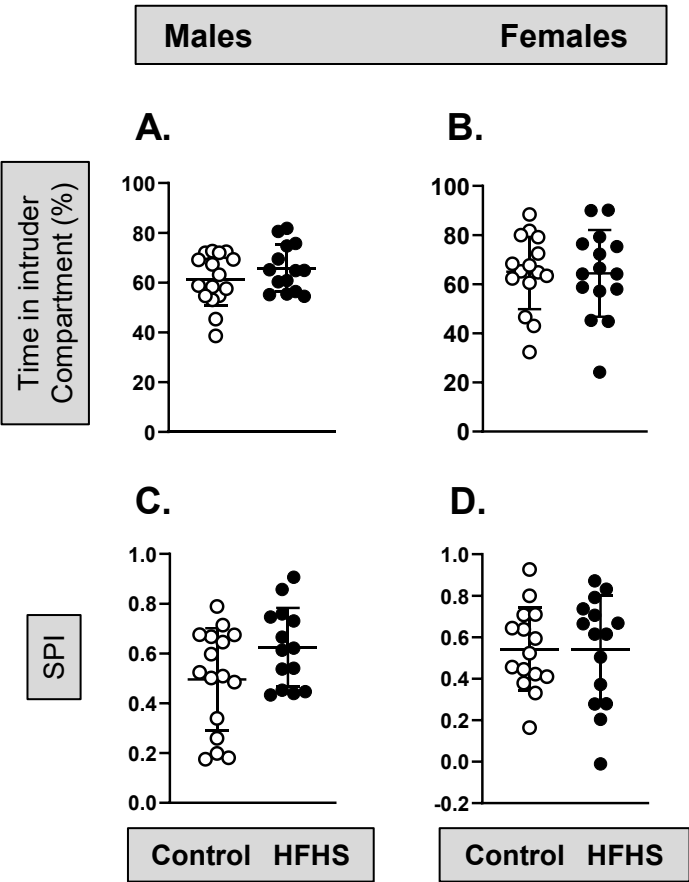

**Supplementary Figure 3.** Effect of a maternal obesogenic diet on adult offspring social interaction behaviour. (A) Percentage time spent in the intruder mouse compartment by male mice from mothers on the control (n=16, white symbols) or high fat, high sugar (HFHS; n=14, black symbols) diet (p=0.22, t-test); (B) Percentage time spent in the intruder mouse compartment by female mice from mothers on the control (n=15, white symbols) or HFHS (n=15, black symbols) diet (p=0.91, t-test); (C, D) The social preference index, a measure of the time spent interacting with the intruder mouse versus the object, in male mice (p=0.063, t-test) and female mice (p=0.99, t-test) from mothers on the control (white symbols) or HFHS (black symbols) diet.
